# Supplementary material
Source: Springer Nature journal article supplement (https://www.springermedizin.de/resource/supplementary/12916_2012_785_MOESM3_ESM.pdf/9598296)
Supplement: MOESM3 [file 9598296]

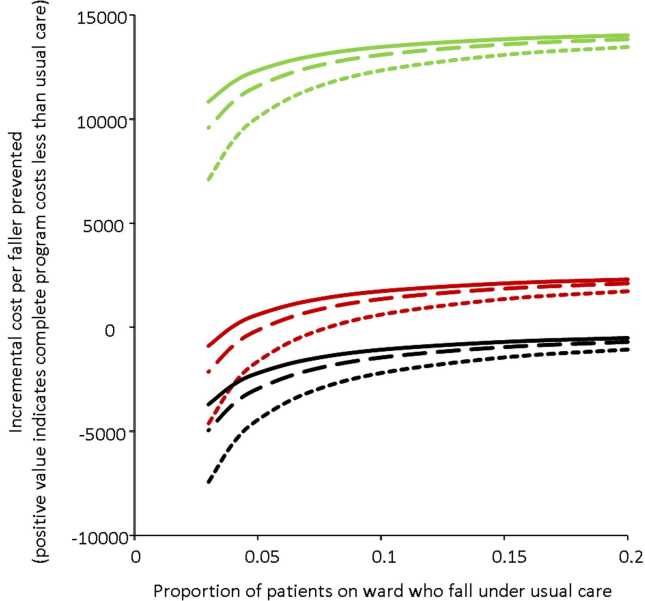

Green: Cost per faller = \$14591 AUD (2008)

Red: Cost per faller = \$2867 AUD (2008)

Black: Cost per faller = \$58 AUD (2008)

Solid: Intervention prevents 40% fallers

Long dash: Intervention prevents 30% fallers

Short dash: Intervention prevents 20% fallers
